# Supplementary material
Source: publisher figshare collection journal article supplement (https://diabetesjournals.figshare.com/ndownloader/files/28871070)
Supplement: Supplementary file 1 [file 28871070]

## SUPPLEMENTAL MATERIAL

**Supplementary Figure 1: Glucose tracings for individual study participants over a 46-hour period by closed loop control system.** In both cases, the announced dinner was at 6 pm the first day on that system and the unannounced dinner was at 6 pm the second day on the system.

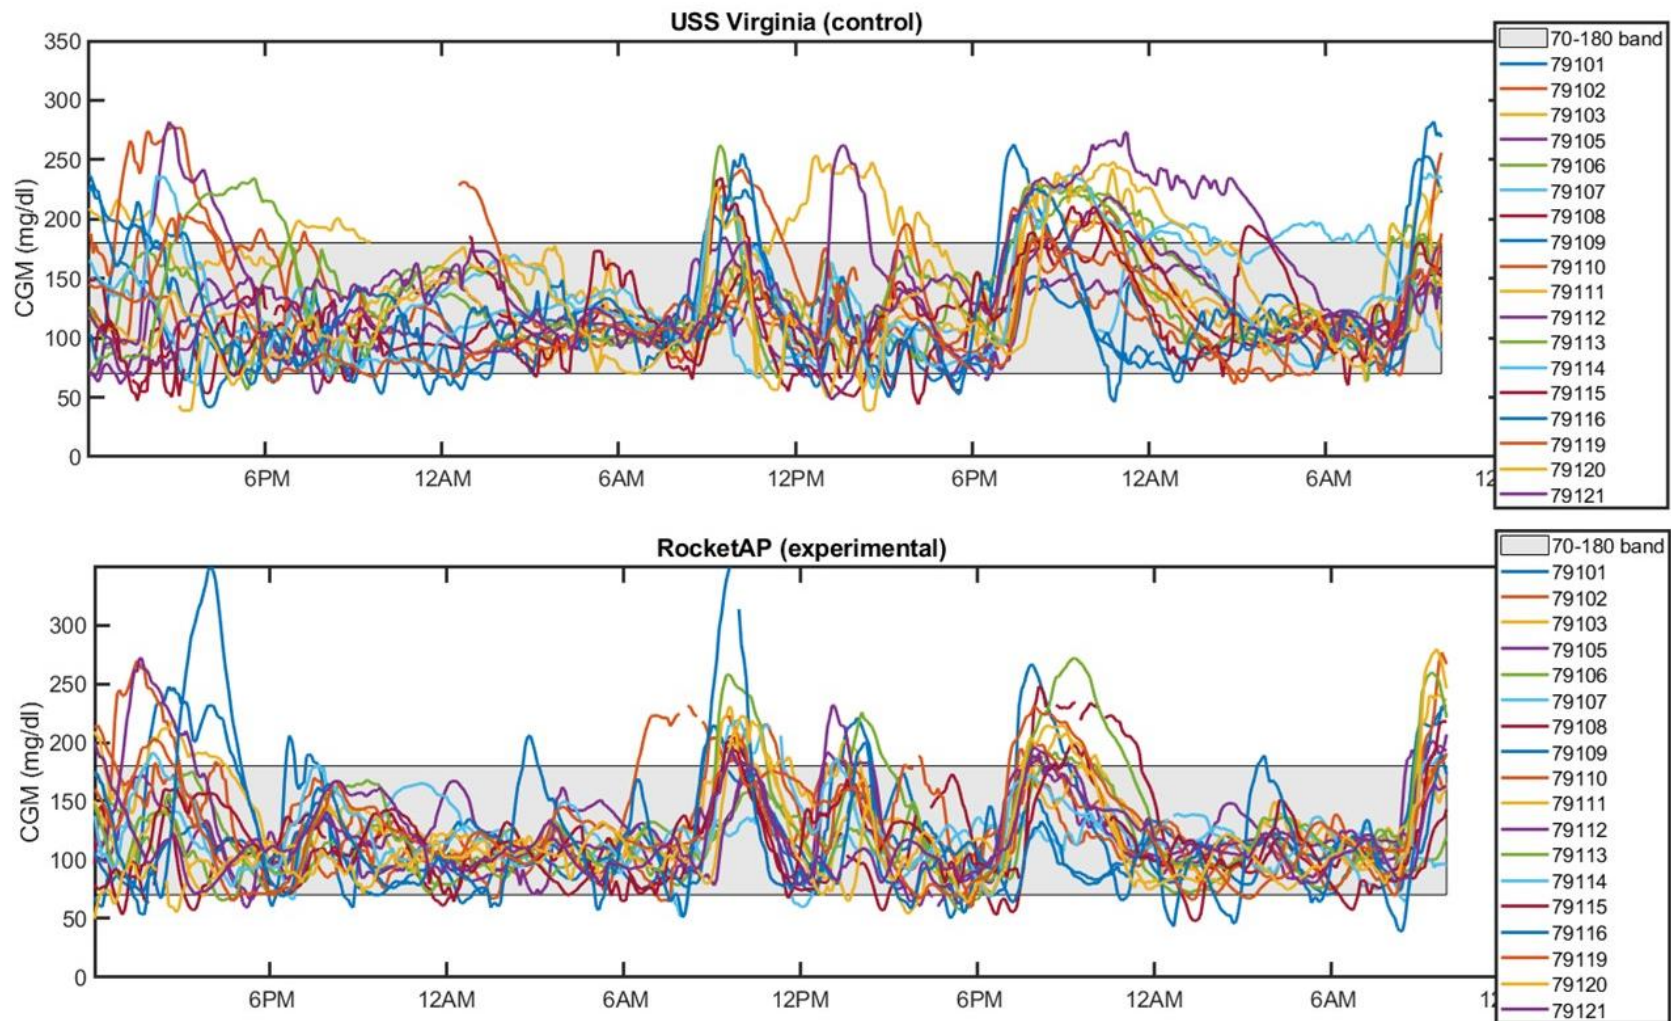

Supplementary Table 1: Participant characteristics

| Characteristic                   | mean±SD,<br>except as noted | [range]      |
|----------------------------------|-----------------------------|--------------|
| Age (years)                      | 15.6±1.6                    | [13-20]      |
| Gender female-male               | 9:9 (ratio)                 | N.A.         |
| Weight (kg)                      | 65.2±11.5                   | [43, 96]     |
| Height (cm)                      | 166.6±8.9                   | [151, 183]   |
| BMI                              | 23.4±3.4                    | [18.7, 29.3] |
| Duration of diabetes (years)     | 7.7±3.2                     | [3.3, 17.7]  |
| HbA1c (%)                        | 7.4±1.5                     | [5.8, 12.6]  |
| TDI (IU)                         | 59.6±16.3                   | [28, 99]     |
| TDU (IU)                         | 64.8±22.6                   | [27, 113]    |
| Carbohydrate ratio (g per IU)    | 7.7 ± 1.9                   | [4.7,10]     |
| Correction factor (mg/dL per IU) | 43±18                       | [20,100]     |
| TIR from home data (%)           | 60.0±17.3                   | [22.8, 87.9] |
| Average basal rate (U/hr)        | 1.3±0.4                     | [0.5 – 2.2]  |

Abbreviations: IU, injected units;TDI, total daily insulin; TIR, time in range 70-180 mg/dL; SD, standard deviation.

**Supplementary Table 2. Glycemic outcomes [dinnertime + 12h]**

|                                           | Unannounced dinner (Secondary outcomes) |            |                              | Announced dinner (Secondary outcomes) |              |                          |
|-------------------------------------------|-----------------------------------------|------------|------------------------------|---------------------------------------|--------------|--------------------------|
|                                           | USS                                     | RCKT       | P-value                      | USS                                   | RCKT         | P-value                  |
| <b>Glycemic metrics</b>                   |                                         |            |                              |                                       |              |                          |
| Mean CGM glucose (mg/dL)                  | 145±25                                  | 123±11     | <b>&lt;0.001<sup>a</sup></b> | 116.5±20                              | 110.2±7.5    | 0.1                      |
| % CGM time < 50 mg/dL (<2.8 mmol/L)       | 0 [0-0]                                 | 0 [0-0]    | 1                            | 0 [0-0]                               | 0 [0-0]      | 1                        |
| % CGM time < 60 mg/dL (<3.3 mmol/L)       | 0 [0-0]                                 | 0 [0-0]    | 0.26                         | 0 [0-0]                               | 0 [0-0]      | 0.08                     |
| % CGM time < 70 mg/dL (<3.9 mmol/L)       | 0 [0-0.7]                               | 0 [0-1.2]  | 0.54                         | 0.7 [0-4.9]                           | 0 [0-2]      | 0.14                     |
| % CGM time 70-140 mg/dL (3.9-7.8 mmol/L)  | 52 [42-64]                              | 73 [70-76] | <b>0.004<sup>b</sup></b>     | 83 [56-90]                            | 89 [78-96]   | <b>0.03<sup>b</sup></b>  |
| % CGM time 70-180 mg/dL (3.9-10.0 mmol/L) | 75 [58-83]                              | 90 [79-96] | <b>&lt;0.001<sup>b</sup></b> | 95 [91-99]                            | 100 [97-100] | <b>0.007<sup>b</sup></b> |
| % CGM time > 180 mg/dL (>10.0 mmol/L)     | 25 [14-37]                              | 8.7 [3-17] | <b>0.003<sup>b</sup></b>     | 0 [0-1.2]                             | 0 [0-0]      | 0.11                     |
| % CGM time > 250 mg/dL (>13.9 mmol/L)     | 0 [0-0]                                 | 0 [0-0]    | 0.52                         | 0 [0-0]                               | 0 [0-0]      | 1                        |
| % CGM time > 300 mg/dL (>16.7 mmol/L)     | 0 [0-0]                                 | 0 [0-0]    | 1                            | 0 [0-0]                               | 0 [0-0]      | 1                        |
| CGM SD (mg/dL)                            | 41±9.2                                  | 36±14      | 0.06                         | 23±8                                  | 21±6.3       | 0.25                     |
| CGM CV (%)                                | 29±6.5                                  | 29±11      | 0.56                         | 20±5                                  | 19±6         | 0.32                     |
| <b>Safety metrics</b>                     |                                         |            |                              |                                       |              |                          |
| Severe hypoglycemia (number of events)    | 0 [0-0]                                 | 0 [0-0]    | 1 <sup>b</sup>               | 0 [0-0]                               | 0 [0-0]      | 1 <sup>b</sup>           |
| Diabetes ketoacidosis (number of events)  | 0 [0-0]                                 | 0 [0-0]    | 1 <sup>b</sup>               | 0 [0-0]                               | 0 [0-0]      | 1 <sup>b</sup>           |
| <b>Technical performance metrics</b>      |                                         |            |                              |                                       |              |                          |
| Percent time in CLC (%)                   | 97±7                                    | 100±1      | 0.16                         | 93±14                                 | 100±2        | 0.14                     |
| Total injected insulin (IU)               | 20±4                                    | 21±8       | 0.28                         | 17.5±5                                | 17±5         | 0.33                     |

Significance levels <0.05 are presented in bold font.

a One-sided paired t-test

b Wilcoxon signed-rank test

Abbreviations: CV, coefficient of variation; CGM, continuous glucose monitor; CLC, closed-loop control; IQR, interquartile range; IU, injected units; RCKT, RocketAP system; SD, standard deviation; USS, Unified Safety System.

;

**Supplementary Table 3. Overall glycemic control (46 hours, 12PM day 1 to 10 AM day 3).**

| <b>Secondary outcomes</b>                 |               |               |                          |
|-------------------------------------------|---------------|---------------|--------------------------|
|                                           | USS           | RCKT          | P-value                  |
| <b>Glycemic metrics</b>                   |               |               |                          |
| Mean CGM glucose (mg/dL)                  | 128±15.5      | 121.6±7.5     | <b>0.05<sup>a</sup></b>  |
| % CGM time < 50 mg/dL (<2.8 mmol/L)       | 0 [0-0]       | 0 [0-0]       | 1                        |
| % CGM time < 60 mg/dL (<3.3 mmol/L)       | 0 [0-0.5]     | 0 [0-0.3]     | 0.14                     |
| % CGM time < 70 mg/dL (<3.9 mmol/L)       | 2.9 [0.9-4.8] | 2.2 [1 - 3.6] | 0.22                     |
| % CGM time 70-140 mg/dL (3.9-7.8 mmol/L)  | 65 [55-71]    | 73 [66-77]    | <b>0.01<sup>b</sup></b>  |
| % CGM time 70-180 mg/dL (3.9-10.0 mmol/L) | 81 [76-86]    | 86 [82-92]    | <b>0.007<sup>b</sup></b> |
| % CGM time > 180 mg/dL (>10.0 mmol/L)     | 14 [7-18]     | 9.5 [5-13]    | <b>0.03<sup>b</sup></b>  |
| % CGM time > 250 mg/dL (>13.9 mmol/L)     | 0 [0 - 1.5]   | 0 [0-1.0]     | 0.49                     |
| % CGM time > 300 mg/dL (>16.7 mmol/L)     | 0 [0-0]       | 0 [0-0]       | 1                        |
| CGM SD (mg/dL)                            | 40.4±7.7      | 38±9.5        | 0.17                     |
| CGM CV (%)                                | 32±4.6        | 31±7.7        | 0.41                     |
| <b>Safety metrics</b>                     |               |               |                          |
| Severe hypoglycemia (number of events)    | 0 [0-0]       | 0 [0-0]       | 1                        |
| Diabetes ketoacidosis (number of events)  | 0 [0-0]       | 0 [0-0]       | 1                        |
| <b>Technical performance metrics</b>      |               |               |                          |
| Percent time in CLC (%)                   | 95±7.4        | 99±1.3        | <b>0.004<sup>b</sup></b> |
| Total injected insulin (IU)               | 85±20         | 78±23         | <b>0.01<sup>a</sup></b>  |

Significance levels <0.05 are presented in bold font.

a One-sided paired t-test

b Wilcoxon signed-rank test

Abbreviations: CV, coefficient of variation; CGM, continuous glucose monitor; CLC, closed-loop control; IQR, interquartile range; IU, injected units; RCKT, RocketAP system; SD, standard deviation; USS, Unified Safety System.

**Supplementary Table 4. Individual participants' data on Time-in-range (TIR) and time <70 mg/dL: pre-study and during each controller.**

| Participant | % TIR (70-180 g/dL) |               |                 |               |                 | % time < 70 mg/dL |               |                 |               |                 |
|-------------|---------------------|---------------|-----------------|---------------|-----------------|-------------------|---------------|-----------------|---------------|-----------------|
|             | Baseline            | RCKT          |                 | USS           |                 | Baseline          | RCKT          |                 | USS           |                 |
|             |                     | Announced day | Unannounced day | Announced day | Unannounced day |                   | Announced day | Unannounced day | Announced day | Unannounced day |
| 79101       | 87.9                | 71.9          | 78.8            | 86.1          | 75.4            | 2.4               | 5.9           | 3.4             | 5.9           | 8.3             |
| 79102       | 22.8                | 70.1          | 93.9            | 97.9          | 88.3            | 0.2               | 0.0           | 0.0             | 0.0           | 5.7             |
| 79103       | 58.3                | 78.8          | 83.7            | 54.9          | 56.1            | 0.2               | 0.0           | 0.0             | 0.0           | 0.0             |
| 79105       | 87.2                | 98.3          | 81.8            | 94.1          | 95.5            | 6.9               | 1.0           | 6.4             | 5.6           | 4.2             |
| 79106       | 39.4                | 100.0         | 81.8            | 97.9          | 69.7            | 0.5               | 0.0           | 4.6             | 1.4           | 0.8             |
| 79107       | 77.0                | 95.5          | 95.8            | 96.5          | 50.0            | 1.1               | 4.2           | 3.4             | 3.1           | 1.9             |
| 79108       | 67.2                | 87.5          | 71.2            | 85.4          | 78.0            | 3.3               | 8.0           | 9.9             | 11.8          | 14.0            |
| 79109       | 79.6                | 100.0         | 90.9            | 78.1          | 96.2            | 3.3               | 0.0           | 1.9             | 12.9          | 2.3             |
| 79110       | 52.7                | 85.17         | 88.3            | 47.2          | 82.2            | 0.4               | 3.5           | 1.1             | 0.7           | 0.0             |
| 79111       | 54.0                | 92.0          | 92.1            | 97.6          | 75.8            | 0.1               | 0.4           | 3.0             | 0.4           | 1.9             |
| 79112       | 46.8                | 88.2          | 81.8            | 86.1          | 80.3            | 0.3               | 1.4           | 1.1             | 0.7           | 0.0             |
| 79113       | 71.9                | 89.9          | 79.2            | 78.5          | 84.1            | 0.6               | 2.8           | 0.0             | 1.0           | 0.0             |
| 79114       | 55.0                | 89.2          | 94.7            | 89.9          | 67.8            | 0.1               | 0.0           | 0.4             | 0.4           | 1.5             |
| 79115       | 46.5                | 95.1          | 89.4            | 69.4          | 82.2            | 0.9               | 2.4           | 2.7             | 5.2           | 1.9             |
| 79116       | 64.4                | 72.9          | 78.0            | 81.6          | 78.8            | 1.5               | 8.7           | 17.1            | 2.4           | 7.2             |
| 79119       | 60.5                | 91.7          | 79.2            | 87.5          | 86.7            | 0.1               | 1.4           | 6.1             | 4.9           | 3.8             |
| 79120       | 41.6                | 88.2          | 84.1            | 74.3          | 68.6            | 3.2               | 4.2           | 2.3             | 7.3           | 5.7             |
| 79121       | 66.9                | 94.8          | 98.1            | 98.6          | 53.8            | 0.3               | 0.0           | 0.0             | 1.0           | 4.9             |

Abbreviations: RCKT, RocketAP system; USS, Unified Safety System.

**Supplementary Table 5. Glycemic outcomes overnight (11:00PM-7:00AM).**

| <b>Secondary outcomes</b>                 |                  |                 |                              |
|-------------------------------------------|------------------|-----------------|------------------------------|
|                                           | USS              | RCKT            | P-value                      |
| <b>Glycemic metrics</b>                   |                  |                 |                              |
| Mean CGM glucose (mg/dL)                  | 123±20           | 106.4±7.3       | <b>0.002<sup>a</sup></b>     |
| % CGM time < 50 mg/dL (<2.8 mmol/L)       | 0 [0-0]          | 0 [0-0]         | 1                            |
| % CGM time < 60 mg/dL (<3.3 mmol/L)       | 0 [0-0]          | 0 [0-0]         | 0.26                         |
| % CGM time < 70 mg/dL (<3.9 mmol/L)       | 0 [0-3.8]        | 0 [0-3.7]       | 0.47                         |
| % CGM time 70-140 mg/dL (3.9-7.8 mmol/L)  | 76.3 [58.5-87.4] | 95.3 [90.4-100] | <b>&lt;0.001<sup>b</sup></b> |
| % CGM time 70-180 mg/dL (3.9-10.0 mmol/L) | 92.2 [81.2-96]   | 99.2 [95.7-100] | <b>&lt;0.001<sup>b</sup></b> |
| % CGM time > 180 mg/dL (>10.0 mmol/L)     | 5 [0-9.8]        | 0 [0-0]         | <b>0.002<sup>b</sup></b>     |
| % CGM time > 250 mg/dL (>13.9 mmol/L)     | 0 [0-0]          | 0 [0-0]         | 1                            |
| % CGM time > 300 mg/dL (>16.7 mmol/L)     | 0 [0-0]          | 0 [0-0]         | 1                            |
| CGM SD (mg/dL)                            | 28±9.7           | 18.1±7.2        | <b>0.004<sup>a</sup></b>     |
| CGM CV (%)                                | 22±5.7           | 7±7             | <b>0.01<sup>a</sup></b>      |
| <b>Safety metrics</b>                     |                  |                 |                              |
| Severe hypoglycemia (number of events)    | 0 [0-0]          | 0 [0-0]         | 1                            |
| Diabetes ketoacidosis (number of events)  | 0 [0-0]          | 0 [0-0]         | 1                            |
| <b>Technical performance metrics</b>      |                  |                 |                              |
| Percent time in CLC (%)                   | 96±7             | 99±2            | 0.07                         |
| Total injected insulin (IU)               | 15±4             | 14±5            | 0.34                         |

Significance levels <0.05 are presented in bold font.

a One-sided paired t-test

b Wilcoxon signed-rank test

Abbreviations: CV, coefficient of variation; CGM, continuous glucose monitor; CLC, closed-loop control; IQR, interquartile range; IU, injected units; RCKT, RocketAP system; SD, standard deviation; USS, Unified Safety System.

**Supplementary Table 6. Hypoglycemic events/treatments**

| <b>Secondary outcomes</b> |           |           |         |
|---------------------------|-----------|-----------|---------|
|                           | USS       | RCKT      | P-value |
| Overall (46 hours)        | 4.5 [1-8] | 3 [1 – 5] | 0.14    |
| DT - DT+6h (Unannounced)  | 0 [0-0]   | 0 [0-0]   | 0.26    |
| DT - DT+6h (Announced)    | 0 [0-1]   | 0 [0-1]   | 0.11    |
| DT - DT+12h (Unannounced) | 0 [0-1]   | 0 [0-0.7] | 0.41    |
| DT - DT+12h (Announced)   | 1 [1-2]   | 0 [0-1]   | 0.13    |
| Overnight                 | 0 [0-2.8] | 0 [0-1.7] | 0.43    |

Significance levels <0.05 are presented in bold font.

a One-sided paired t-test

b Wilcoxon signed-rank test

Abbreviations: DT, dinner time; RCKT, RocketAP system; USS, Unified Safety System.

**Supplementary Table 7. Cumulative Bolus Priming System (BPS)**

| Subject | TDI | Time of first BPS injection after meal (min) | Cumulative BPS |               |
|---------|-----|----------------------------------------------|----------------|---------------|
|         |     |                                              | BPS 1h (%TDI)  | BPS 2h (%TDI) |
| 79101   | 56  | 11                                           | 3.93 (7)       | 3.93 (7)      |
| 79102   | 100 | 37                                           | 5.00 (5)       | 5.00 (5)      |
| 79103   | 73  | 24                                           | 3.65 (5)       | 3.65 (5)      |
| 79105   | 76  | 14                                           | 3.81 (5)       | 3.81 (5)      |
| 79106   | 44  | 20                                           | 1.32 (3)       | 1.32 (3)      |
| 79107   | 27  | N.A.                                         | 0.00 (0)       | 0.00 (0)      |
| 79108   | 54  | N.A.                                         | 0.00 (0)       | 0.00 (0)      |
| 79109   | 69  | 16                                           | 2.07 (3)       | 2.07 (3)      |
| 79110   | 53  | 18                                           | 1.69 (3)       | 1.69 (3)      |
| 79111   | 71  | 49                                           | 2.13 (3)       | 2.13 (3)      |
| 79112   | 46  | 30                                           | 1.38 (3)       | 1.38 (3)      |
| 79113   | 100 | 37                                           | 3.00 (3)       | 3.13 (3)      |
| 79114   | 46  | 28                                           | 1.38 (3)       | 1.38 (3)      |
| 79115   | 71  | 24                                           | 3.55 (5)       | 3.55 (5)      |
| 79116   | 44  | N.A.                                         | 0.00 (0)       | 0.00 (0)      |
| 79119   | 100 | 23                                           | 6.00 (6)       | 6.00 (6)      |
| 79120   | 50  | 54                                           | 1.63 (3)       | 1.63 (3)      |
| 79121   | 66  | 18                                           | 1.98 (3)       | 1.98 (3)      |

N.A. (not applicable), indicates that no BPS injection was provided for that particular meal.



## Bolus Priming System (BPS)

The BPS integrates to the core MPC system as a dosing module that punctually commands comparatively large amounts of insulin computed as fractions of TDI, fractions that progressively increase with the estimation of the “*probability of a large glycemic disturbance occurring in the last 30 min*”. The BPS module runs every 5 min with the procedure detailed as follows:

- A 2<sup>nd</sup> order polynomial is fitted onto the last 30-min worth of CGM data where the coefficients  $p_1$ ,  $p_2$ , and  $p_3$  are generated.
- The coefficients in (a) are used as features in a logistic regression classification algorithm that detects postprandial periods. This classification algorithm was trained with data collected for a previous study.<sup>1</sup>
- The disturbance probability at each iteration,  $\pi_k$ , is found using the following equation

$$\pi_k = \frac{1}{1 + e^{-y_{log}}}$$

with  $y_{log}$  the output from the logistic regression classifier.

- This probability is then used to determine if a bolus is required and if so, how much insulin should be delivered. The bolus priming system has a predetermined schedule for what percent of the individual's TDI amount should be administered at each probability threshold. Before an amount is delivered, the amount of insulin on board from antecedent bolus priming doses is subtracted. This dose is computed as

$$J_{BPS} = \max \left( P_{TDI} \cdot TDI - \frac{IOB_{BPS}}{TDI}, 0 \right)$$

where  $J_{BPS}$  is the amount of insulin commanded by the BPS,  $P_{TDI}(\%)$  is the percentage of the patient's TDI requested based on the dosing schedule below  $IOB_{BPS}$

$$P_{TDI} = \begin{cases} 3\% & \text{if } 0.3 \leq \pi_k < 0.5 \\ 5\% & \text{if } 0.5 \leq \pi_k < 0.7 \\ 6\% & \text{if } 0.7 \leq \pi_k < 0.9 \\ 7\% & \text{if } \pi_k \geq 0.9 \end{cases}$$

$IOB_{BPS}$  accounts for the active insulin in the circulation as per previous BPS injections using a 6h-insulindecaying curve.

The disturbance probability thresholds together with their corresponding insulin doses were determined through the use of a method that has been employed before to “replay” past real data using regularized deconvolution to solve for unknown inputs into the glucose-insulin model.<sup>2</sup>

- Garcia-Tirado J, Brown SA, Laichuthai N, et al. Anticipation of Historical Exercise Patterns by a Novel Artificial Pancreas System Reduces Hypoglycemia During and After Moderate-Intensity Physical Activity in People with Type 1 Diabetes. *Diabetes Technol Ther*. 2020.
- Hughes J, Gautier T, Colmegna P, Fabris C, Breton MD. Replay Simulations with Personalized Metabolic Model for Treatment Design and Evaluation in Type 1 Diabetes. *J Diabetes Sci Technol*. 2020:1932296820973193.
